# Supplementary material
Source: PubMed Central journal article supplement (PMC6800097)

### Supplementary figure 3

A)

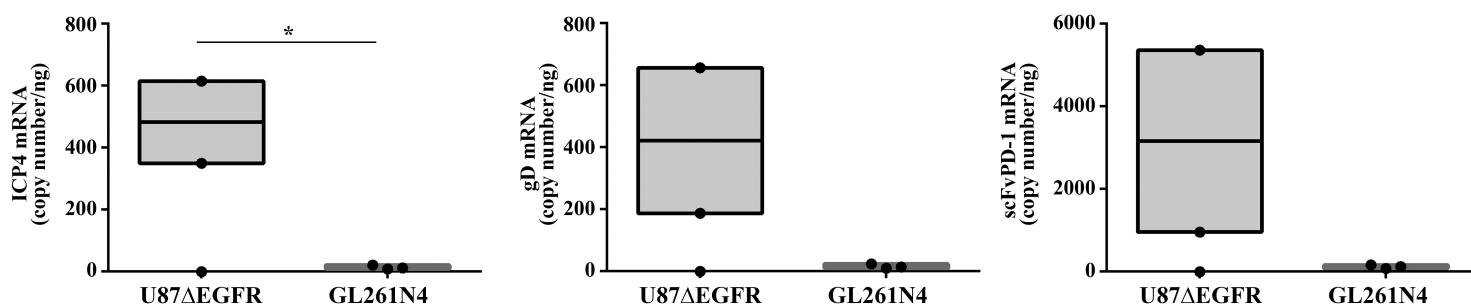

B)

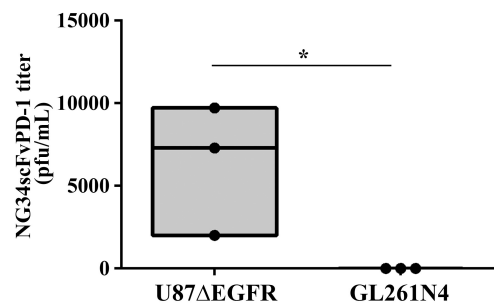

Supplement: NIHMS1007085-supplement-Suppl_Fig_3.pdf [file NIHMS1007085-supplement-Suppl_Fig_3.pdf]

### Supplementary figure 1

A)

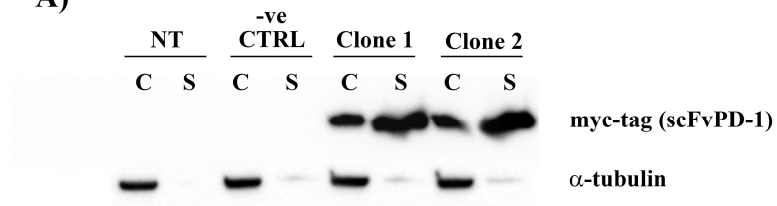

B)

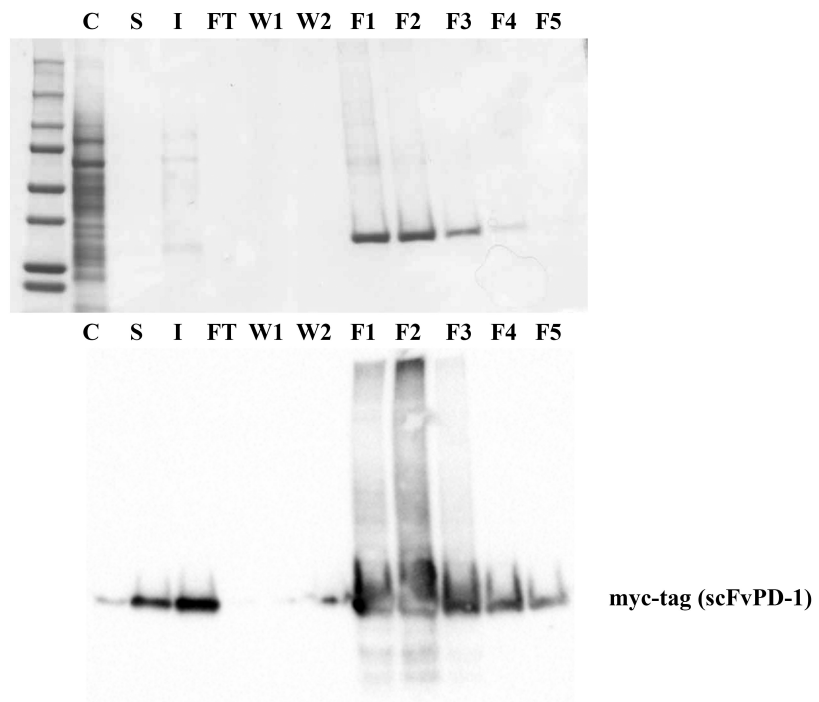

Supplement: NIHMS1007085-supplement-Supplemnental_Figure_1.pdf [file NIHMS1007085-supplement-Supplemnental_Figure_1.pdf]
